# Supplementary material for: The Reduction in Microtubule Arrays Caused by the Dysplasia of the Non-Centrosomal Microtubule-Organizing Center Leads to a Malformed Organ of Corti in the Cx26-Null Mouse
Source: MDPI journal article supplement (doi:10.3390/biomedicines10061364), 2022-06-09
Supplement: s1 [file s1]

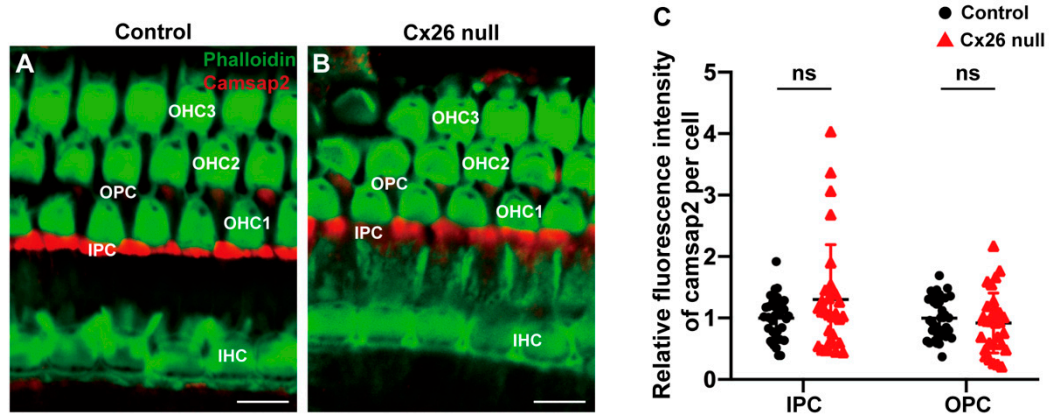

**Supplementary Figure S1. No changes found in protein expression level of camsap2 at the non-centrosomal MTOCs near centrosome at P14.** (A,B) The immunofluorescence staining of camsap2 in the apical cochlea at P14; (C) Quantification of immunolabeling for camsap2 in IPCs and OPCs from the control and Cx26 null groups (30~36 IPCs and 30~36 OPCs from 5~6 mice in each group) at P14. The assessed levels were displayed in plot A, B. The relative fluorescence intensity of camsap2:  $1.00 \pm 0.06$  (control) VS  $1.30 \pm 0.16$  (Cx26 null) in IPCs,  $1.00 \pm 0.06$  (control) VS  $0.92 \pm 0.09$  (Cx26 null) in OPCs, data were expressed as mean with SEM, ns: no significant difference; P: postnatal, IHC: inner hair cell, OHC: outer hair cell, IPC: inner pillar cell, OPC: outer pillar cell. Bars: about 10  $\mu$ m (A, B).
